# Supplementary material for: A plasma cytokine and angiogenic factor (CAF) analysis for selection of bevacizumab therapy in patients with metastatic colorectal cancer
Source: PubMed Central journal article supplement (PMC4664961; doi:10.1038/srep17717), 2015-12-01
Supplement: srep17717-s1.pdf [file srep17717-s1.pdf]

# **A plasma cytokine and angiogenic factor (CAF) analysis for selection of bevacizumab therapy in patients with metastatic colorectal cancer**

Long Bai<sup>1,2\*</sup>, Feng Wang<sup>1,2\*</sup>, Dong-sheng Zhang<sup>1,2</sup>, Cong Li<sup>3</sup>, Ying Jin<sup>1,2</sup>, De-shen Wang<sup>1,2</sup>, Dong-liang Chen<sup>1,2</sup>, Miao-zhen Qiu<sup>1,2</sup>, Hui-yan Luo<sup>1,2</sup>, Zhi-qiang Wang<sup>1,2</sup>, Yu-hong Li<sup>1,2</sup>, Feng-hua Wang<sup>1,2</sup> §, Rui-hua Xu<sup>1,2</sup> §

Authors' Affiliations: <sup>1</sup> Department of Medical Oncology, Sun Yat-sen University Cancer Center; <sup>2</sup> State Key Laboratory of Oncology in South China; Collaborative Innovation Center for Cancer Medicine, Guangzhou, Guangdong 510060, P. R. China; <sup>3</sup> Department of Medical Oncology, Zhejiang Cancer Hospital, Hangzhou 310022, P. R. China.

§Corresponding Author: Rui-hua Xu, Department of Medical Oncology, Sun Yat-sen University Cancer Center, 651 Dongfeng Road East, Guangzhou, Guangdong 510060, P. R. China. Tel: +86-20-87343468; Email: [xurh@sysucc.org.cn](mailto:xurh@sysucc.org.cn). Wang-feng Hua, Department of Medical Oncology, Sun Yat-sen University Cancer Center, 651 Dongfeng Road East, Guangzhou, Guangdong 510060, P. R. China. Tel: +86-20-87343795; Email: [wangfh@sysucc.org.cn](mailto:wangfh@sysucc.org.cn).

\*These authors contributed equally to the manuscript.

Table S1. 36 baseline CAFs analyzed in protein microarray profiling

|                        |                |                       |
|------------------------|----------------|-----------------------|
| Activin A              | IFN gamma      | PIGF                  |
| AgRP/ART               | IGF-1          | RANTES / CCL5         |
| Angiogenin (ANG)       | IL-1 alpha     | TGF beta 1            |
| Angiopoietin-1 (ANG-1) | IL-2           | TIMP-1                |
| Angiopoietin-2 (ANG-2) | IL-6           | TIMP-2                |
| ANGPTL4                | IL-8 / CXCL8   | TNF alpha             |
| bFGF / FGF-2           | IL-17          | TNF beta              |
| ENA-78 / CXCL5         | IP-10 / CXCL10 | TPO                   |
| ESM-1 / endocan        | Leptin         | VEGF-A <sup>121</sup> |
| GRO (CXCL 1,2&3)       | LIF            | sVEGFR1               |
| HB-EGF                 | MCP-1 / CCL2   | sVEGFR2               |
| HGF                    | PDGF-BB        | vWF                   |

Abbreviations: CAFs, cytokine and angiogenic factors; AgRP/ART, agouti-related protein/agouti-related transcript; ANGPTL4, angiopoietin-like 4; bFGF/FGF-2, basic fibroblast growth factor/fibroblast growth factor 2; ENA-78/CXCL5, neutrophil-activating peptide 78/chemokine (C-X-C motif) ligand 5; ESM-1, endothelial cell specific molecule-1; GRO (CXCL 1,2&3), groucho (chemokine [C-X-C motif] ligand 1,2&3); HB-EGF, heparin-binding EGF-like growth factor; HGF, hepatocyte growth factor; IFN gamma, interferon gamma; IGF-1, insulin-like growth factor 1; IL-1 alpha, interleukin-1 alpha; IP-10- interferon-gamma-inducible protein 10; LIF, leukaemia Inhibitor Factor; MCP-1/CCL2, monocyte chemotactic protein 1/chemokine (C-C motif) ligand 2; PDGF-BB, platelet-derived growth factor beta polypeptide b; PIGF, placental growth factor; TGF beta 1, transforming growth factor beta 1; TIMP-1, metalloproteinase inhibitor 1; TNF alpha, tumor necrosis factor alpha; TPO, thrombopoietin; VEGF-A<sup>121</sup>, short isoform vascular endothelial growth factor-A<sup>121</sup>; sVEGFR1, soluble vascular endothelial growth factor receptor-1; vWF, von Willebrand factor.

Table S2. Baseline biomarker levels and associations with clinical characteristics by ELISA test

| Clinical characteristics <i>N</i> (%) | ANGPTL4          |                   |                       | VEGF-A <sup>121</sup> |                   |                       | HGF              |                   |                       |
|---------------------------------------|------------------|-------------------|-----------------------|-----------------------|-------------------|-----------------------|------------------|-------------------|-----------------------|
|                                       | Low <sup>a</sup> | High <sup>a</sup> | <i>p</i> <sup>b</sup> | Low <sup>a</sup>      | High <sup>a</sup> | <i>p</i> <sup>b</sup> | Low <sup>a</sup> | High <sup>a</sup> | <i>p</i> <sup>b</sup> |
| Treatment groups                      |                  |                   | 0.055                 |                       |                   | 0.531                 |                  |                   | 0.551                 |
| bevacizumab group                     | 46 (48.9)        | 48 (51.1)         |                       | 62 (65.3)             | 33 (34.7)         |                       | 52 (57.1)        | 39 (42.9)         |                       |
| control group                         | 32 (34.8)        | 60 (65.2)         |                       | 61 (69.3)             | 27 (30.7)         |                       | 59 (62.1)        | 36 (37.9)         |                       |
| Median age at diagnosis               | 55 (28-78)       | 53 (21-83)        | 0.294                 | 53 (21-77)            | 56 (25-83)        | 0.465                 | 54 (28-83)       | 55 (21-78)        | 0.625                 |
| Sex                                   |                  |                   | 0.170                 |                       |                   | 0.521                 |                  |                   | 0.759                 |
| male                                  | 53 (46.1)        | 62 (53.9)         |                       | 78 (69.0)             | 35 (31.0)         |                       | 70 (60.9)        | 45 (39.1)         |                       |
| female                                | 25 (35.2)        | 46 (64.8)         |                       | 45 (64.3)             | 25 (35.7)         |                       | 36 (54.5)        | 30 (45.5)         |                       |
| Primary tumor                         |                  |                   | 0.213                 |                       |                   | 0.740                 |                  |                   | 0.433                 |
| colon                                 | 47 (38.5)        | 75 (61.5)         |                       | 80 (66.1)             | 41 (33.9)         |                       | 70 (57.4)        | 52 (42.6)         |                       |
| rectum                                | 31 (50.0)        | 31 (50.0)         |                       | 43 (69.4)             | 19 (30.6)         |                       | 41 (64.1)        | 23 (35.9)         |                       |
| ECOG performance status               |                  |                   | 0.734                 |                       |                   | 0.361                 |                  |                   | 0.302                 |
| 0-1                                   | 73 (41.5)        | 103 (58.5)        |                       | 116 (66.7)            | 58 (33.3)         |                       | 107 (60.8)       | 69 (39.2)         |                       |
| ≥2                                    | 3 (50.0)         | 3 (50.0)          |                       | 3 (60.0)              | 2 (40.0)          |                       | 2 (33.3)         | 4 (66.7)          |                       |
| Pathology                             |                  |                   | 0.600                 |                       |                   | 0.085                 |                  |                   | 0.291                 |
| moderately differentiated             | 47 (40.9)        | 68 (59.1)         |                       | 73 (64.0)             | 41 (36.0)         |                       | 71 (61.7)        | 44 (38.3)         |                       |
| poorly differentiated                 | 21 (45.7)        | 25 (54.3)         |                       | 35 (79.5)             | 9 (20.5)          |                       | 24 (52.2)        | 22 (47.8)         |                       |
| Metastasis                            |                  |                   | 0.456                 |                       |                   | 0.430                 |                  |                   | 0.098                 |
| single                                | 40 (39.2)        | 62 (60.8)         |                       | 70 (70.0)             | 30 (30.0)         |                       | 55 (53.9)        | 47 (46.1)         |                       |
| multiple                              | 38 (45.2)        | 46 (54.8)         |                       | 53 (63.9)             | 30 (36.1)         |                       | 56 (66.7)        | 28 (33.3)         |                       |

|                                    |           |           |       |           |           |              |           |           |       |
|------------------------------------|-----------|-----------|-------|-----------|-----------|--------------|-----------|-----------|-------|
| Peritoneal metastasis              | 24 (47.1) | 27 (52.9) | 0.408 | 34 (68.0) | 16 (32.0) | 0.74         | 32 (62.7) | 19 (37.3) | 0.620 |
| Metastasis resection               | 18 (42.9) | 24 (57.1) | 0.680 | 29 (69.0) | 13 (31.0) | 0.955        | 25 (59.5) | 17 (40.5) | 0.966 |
| Resection of primary tumor         | 61 (43.3) | 80 (56.7) | 0.604 | 99 (71.2) | 40 (28.2) | <b>0.045</b> | 84 (59.6) | 57 (40.4) | 1.000 |
| Backbone chemotherapy              |           |           | 0.800 |           |           | 0.859        |           |           | 0.233 |
| oxaliplatin-based                  | 50 (41.7) | 70 (58.3) |       | 79 (64.2) | 39 (35.8) |              | 75 (62.5) | 45 (37.5) |       |
| irinotecan-based                   | 27 (42.9) | 36 (57.1) |       | 44 (71.0) | 18 (29.0) |              | 34 (54.0) | 29 (46.0) |       |
| Prior adjuvant chemotherapy        | 27 (50.9) | 26 (49.1) | 0.138 | 37 (71.2) | 15 (28.8) | 0.600        | 34 (64.2) | 19 (35.8) | 0.508 |
| Recurrent disease                  | 24 (44.4) | 30 (55.6) | 0.744 | 36 (67.9) | 17 (32.1) | 1.000        | 29 (53.7) | 25 (46.3) | 0.325 |
| Maintenance treatment <sup>c</sup> | 10 (41.7) | 14 (58.3) | 1.000 | 16 (66.7) | 8 (33.3)  | 0.944        | 12 (50.0) | 12 (50.0) | 0.368 |
| Second-line treatment              | 12 (40.0) | 18 (60.0) | 0.611 | 22 (73.3) | 8 (26.7)  | 0.551        | 20 (66.7) | 10 (33.3) | 0.472 |
| Anti-EGFR treatment after PD       | 25 (47.2) | 28 (52.8) | 0.325 | 37 (71.2) | 15 (28.8) | 0.600        | 30 (56.6) | 23 (43.4) | 0.620 |
| First-line duration of CT          |           |           | 0.882 |           |           | 0.161        |           |           | 0.655 |
| Short <sup>d</sup>                 | 38 (40.9) | 55 (59.1) |       | 58 (62.4) | 35 (37.6) |              | 55 (57.9) | 40 (42.1) |       |
| Long <sup>d</sup>                  | 40 (43.0) | 53 (57.0) |       | 65 (72.2) | 25 (27.8) |              | 56 (61.5) | 35 (38.5) |       |
| First-line duration of BEV         |           |           | 0.532 |           |           | 0.495        |           |           | 1.000 |
| Short <sup>e</sup>                 | 21 (46.7) | 24 (53.3) |       | 29 (65.9) | 15 (34.1) |              | 26 (57.8) | 19 (42.2) |       |
| Long <sup>e</sup>                  | 25 (54.3) | 21 (45.7) |       | 33 (73.3) | 12 (26.7) |              | 56 (60.9) | 20 (43.5) |       |

<sup>a</sup> High indicates above the corresponding cutoff and low indicates less than or equal to the corresponding cutoff. The cutoff values for ANGPTL4, HGF and VEGF121 were 1.97 ng/ml, 0.88 ng/ml and 0.59 ng/ml, respectively. <sup>b</sup> Examine correlations between patient characteristics and biomarker levels. <sup>c</sup> Monotherapy of capecitabine or bevacizumab, or combined with both. <sup>d</sup> High indicates above the median first-line duration of CT; low indicates less than or equal to the median. The median first-line chemotherapy duration was 4.5 months in the bevacizumab group and 3.8 months in the control group. <sup>e</sup> High indicates above the median first-line duration of BEV; low indicates less than or equal to the median. The median first-line BEV duration was 4.0 months in the bevacizumab group. Abbreviations: ELISA, enzyme-linked immunosorbent assay; CT, chemotherapy; BEV, bevacizumab; Statistical significance was set at 0.05 based on a two-sided test. *P*-values listed in bold were notable for possible association with clinical outcomes.

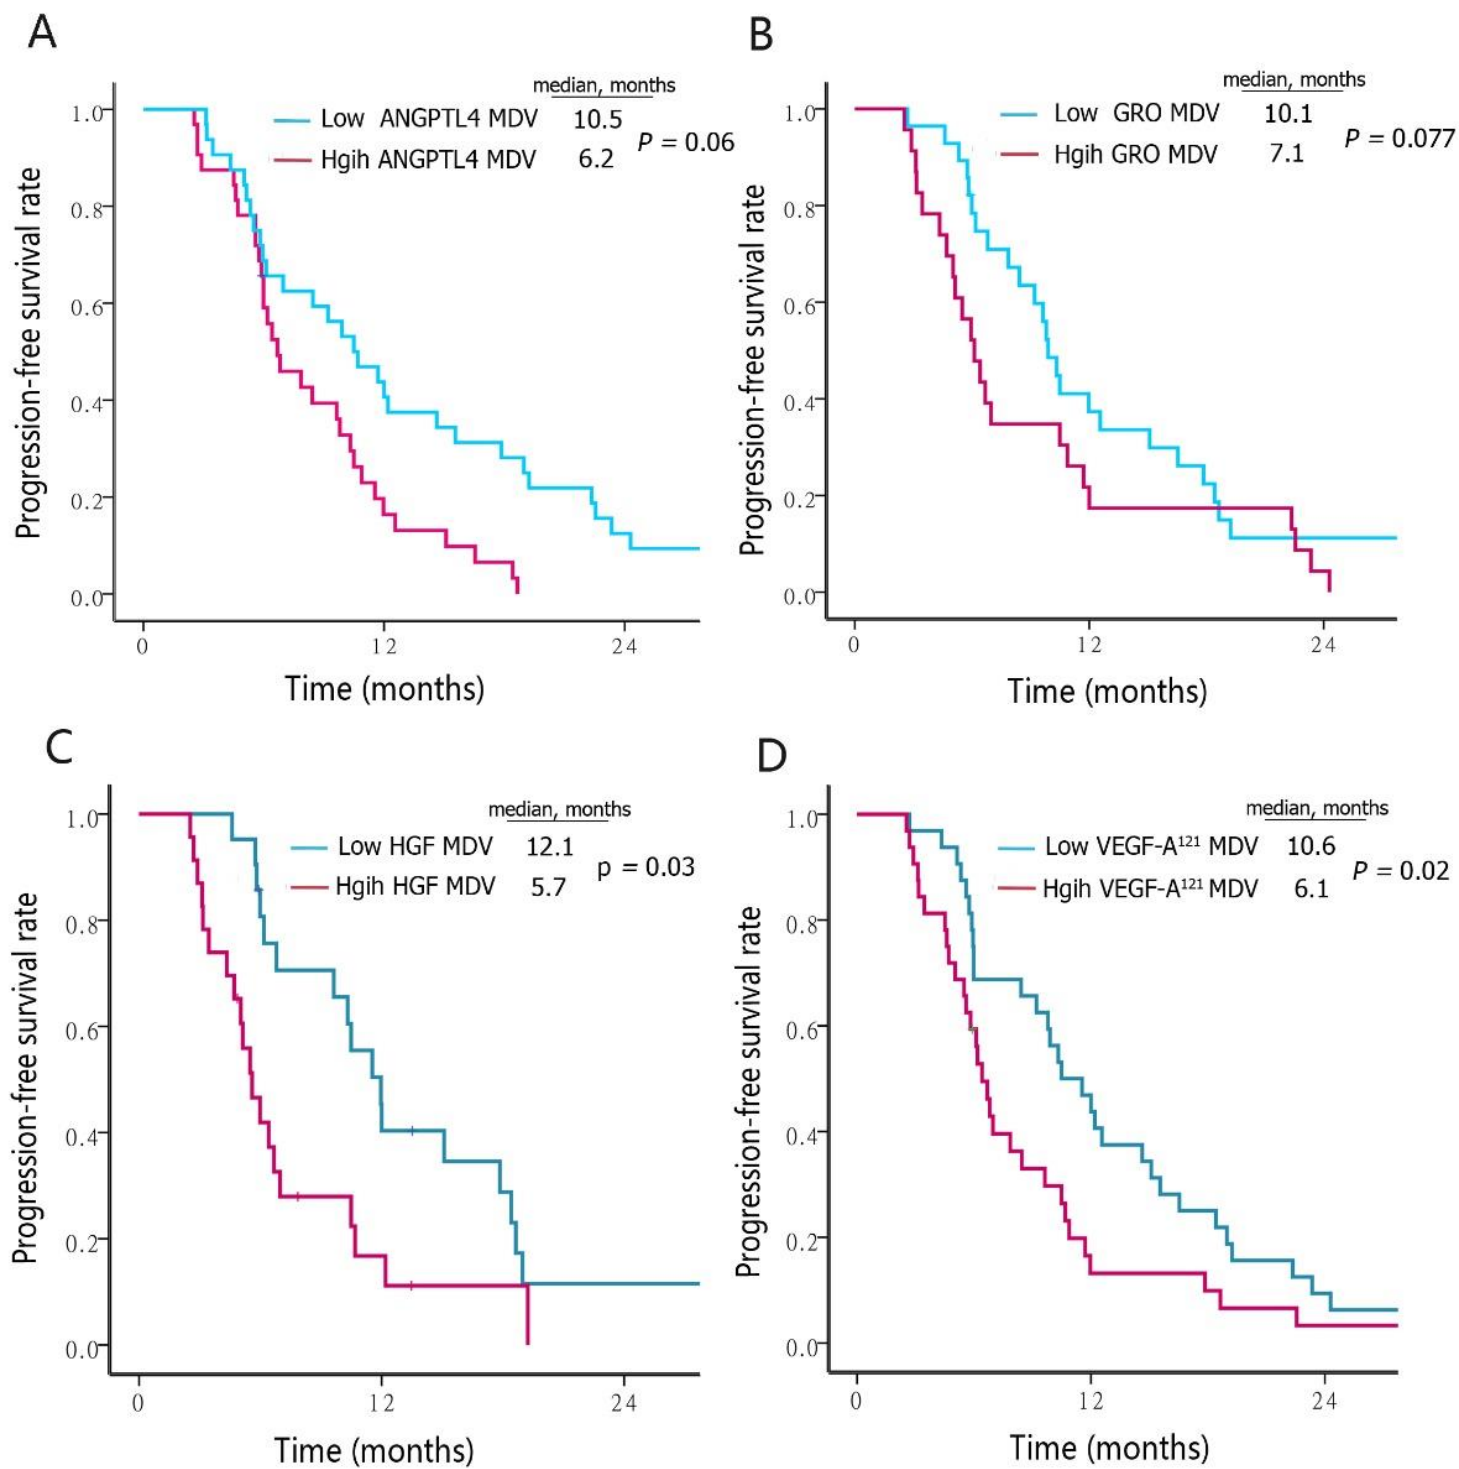

Figure S1. CAFs with significant or borderline prognostic values in protein microarray profiling were categorised as binary variables (using each median MDV as cutoff) for illustration of PFS. MDV, mean densitometric value; CAF, cytokine and angiogenic factor; ANGPTL4, angiopoietin-like 4; GRO (CXCL 1,2&3), groucho (chemokine [C-X-C motif] ligand 1,2&3); HGF, hepatocyte growth factor; VEGF-A<sup>121</sup>, isoform vascular endothelial growth factor-A<sup>121</sup>.

## **Supplementary experimental procedure and data analysis**

### ***Plasma sample collection***

4 milliliters pretreatment peripheral venous blood from each patient was drawn into a sodium citrated Vacutainer tube (BD Biosciences, San Jose, CA; catalog #369714). After mixing, the tubes were centrifuged at 2500 g for 15 minutes for separation of plasma and mononuclear cell layers. The upper layer of plasma was transferred to a fresh tube and centrifuged one more time at 2500g for 15 minutes. Then the plasma samples were aliquoted and immediately stored at – 80 °C until use. Before analysis, samples were thawed overnight at 4°C and centrifuged at 1,500 × g to remove debris.

### ***Protein microarray profiling***

The standard-sized histology slides were pre-coated with antibodies against target proteins that anchored onto the slides for sandwich-ELISA detection. Next, slides were individually placed in chambers of 16-well tissue culture plates and blocked with the kit's blocking buffer. After the blocking step, plasma diluted 1:10 was added in blocking buffer. After 2 hours of incubation, slides were repeatedly washed and then incubated with biotin-conjugated antibodies for 2 hours. Following a further set of washes, horse radish peroxidase conjugated streptavidin was added and incubated for 1 hour followed by a final set of washes to washed off nonspecific proteins

The slices were then placed in the manufacturer's chemiluminescence detection buffer and incubated for 2 minutes. Slices were subsequently exposed to with adhesive film (included in kit). The film was then captured using a GenePix® 4000A high resolution scanner (Molecular Devices; Sunnyvale, Orleans, USA) and saved digitally. The densitometric value of each locus on the array was finally measured

using a ImageJ software (National Institutes of Health; Bethesda, Maryland, USA). Subsequently, normalization was performed to account for variations between one slice and another to permit valid cross slice comparisons. Briefly, the mean value of the manufacturer's positive control replicates on each slice, called the loading control densitometric value (LCDV), was determined. The LCDV value for each membrane was subtracted from all experimental marker densitometric values on that slice. The resulting value is referred to as the loading control normalized densitometric value (LCNDV) of the marker. Hence, a second normalization was done for each plasma sample by taking the mean densitometric value of all 36 experimental markers for that sample and subtracting it from LCNDV. The resulting value is the globally normalized densitometric value (GNDV) of the loci. The GNDV values of the quadruplicates for each marker were averaged. This value was referred to as the mean densitometric value (MDV) of each cytokine, and was the value used for interpretation of data.
